# Supplementary material for: Interplay between local environments and photoluminescence of Eu2+in Ba2Zr2Si3O12: blue shift emission, optimal bond valence and luminescence mechanisms
Source: Royal Society of Chemistry journal article supplement (doi:10.1039/c5tc00152h), 2015-01-01
Supplement: c5tc00152h1.pdf [file c5tc00152h1.pdf]

## Supporting Information

### **Interplay between local environments and photoluminescence of $\text{Eu}^{2+}$ in $\text{Ba}_2\text{Zr}_2\text{Si}_3\text{O}_{12}$ : blue shift emission, optimal bond valence and luminescence 5 mechanisms**

*Author(s):* Yang Zhang,<sup>a, b</sup> Xuejiao Li,<sup>a, b</sup> Kai Li,<sup>a, b</sup> Hongzhou Lian,<sup>a</sup> Mengmeng Shang,<sup>a</sup> and Jun Lin<sup>a, \*</sup>

<sup>a</sup>State Key Laboratory of Rare Earth Resource Utilization, Changchun Institute of Applied Chemistry, Chinese Academy of Sciences, Changchun 130022, People's Republic of China, E-mail: jlin@ciac.ac.cn;

<sup>b</sup> University of the Chinese Academy of Sciences, Beijing 100049, People's Republic of China

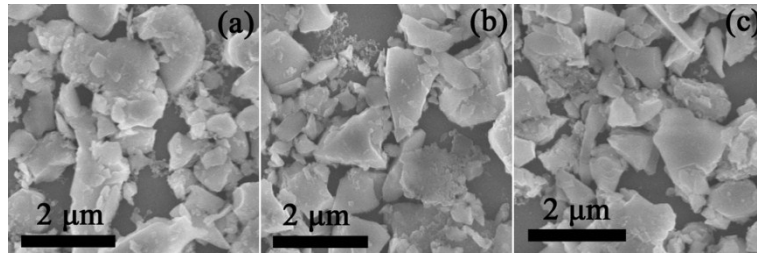

**Fig. S1** The SEM images of (a) BZSO: 0.03Eu<sup>2+</sup>, (b) BZSO: 0.03Eu<sup>2+</sup>, 0.10Ca<sup>2+</sup>, (c) BZSO: 0.03Eu<sup>2+</sup>, 0.10Sr<sup>2+</sup>.

**Table S1.** Crystallographic data of Ba<sub>2</sub>Zr<sub>2</sub>Si<sub>3</sub>O<sub>12</sub>: 0.03Eu<sup>2+</sup>, as determined by the Rietveld refinement of power XRD data at room temperature.

| atom | site        | <i>x</i> | <i>y</i> | <i>z</i> | Occupancy |
|------|-------------|----------|----------|----------|-----------|
| Ba1  | 4 <i>a</i>  | 0.568    | 0.568    | 0.568    | 0.985     |
| Ba2  | 4 <i>a</i>  | 0.797    | 0.797    | 0.797    | 0.985     |
| Zr1  | 4 <i>a</i>  | 0.084    | 0.084    | 0.084    | 1.00      |
| Zr2  | 4 <i>a</i>  | 0.35     | 0.35     | 0.35     | 1.00      |
| Si1  | 12 <i>b</i> | 0.033    | 0.268    | 0.375    | 1.00      |
| O1   | 12 <i>b</i> | 0.012    | 0.196    | 0.246    | 1.00      |
| O2   | 12 <i>b</i> | 0.173    | 0.258    | 0.427    | 1.00      |
| O3   | 12 <i>b</i> | 0.021    | 0.057    | 0.713    | 1.00      |
| O4   | 12 <i>b</i> | 0.002    | 0.412    | 0.349    | 1.00      |
| Eu1  | 4 <i>a</i>  | 0.568    | 0.568    | 0.568    | 0.015     |
| Eu2  | 4 <i>a</i>  | 0.797    | 0.797    | 0.797    | 0.015     |

Space group: *P*2<sub>1</sub>3 (No. 198), *Z* = 4, *a* = *b* = *c* = 10.24278 Å, *V* = 1074.62 Å<sup>3</sup>, α = β = γ = 90°, *R*<sub>p</sub> = 6.05%, *R*<sub>wp</sub> = 7.76%.

**Table S2.** Crystallographic data and reliability factor of BZSO: 0.03Eu<sup>2+</sup>, *m*Ca<sup>2+</sup> (*m* = 0.03–0.10) and BZSO: 0.03Eu<sup>2+</sup>, *n*Sr<sup>2+</sup> (*n* = 0.03–0.10) materials.

| BZSO: 0.03Eu <sup>2+</sup> , <i>m</i> Ca <sup>2+</sup> |                 |                 |                 |                 |                 |
|--------------------------------------------------------|-----------------|-----------------|-----------------|-----------------|-----------------|
| <i>m</i>                                               | <i>m</i> = 0.03 | <i>m</i> = 0.05 | <i>m</i> = 0.06 | <i>m</i> = 0.08 | <i>m</i> = 0.10 |
| <i>a</i> = <i>b</i> = <i>c</i>                         | 10.23848        | 10.23687        | 10.23677        | 10.23619        | 10.23066        |
| cell volume                                            | 1073.26         | 1072.76         | 1072.72         | 1072.54         | 1070.80         |
| <i>R</i> <sub>p</sub>                                  | 6.46%           | 6.18%           | 6.62%           | 6.5%            | 6.56%           |
| <i>R</i> <sub>wp</sub>                                 | 8.16%           | 8.18%           | 8.94%           | 8.41%           | 8.71%           |
| BZSO: 0.03Eu <sup>2+</sup> , <i>n</i> Sr <sup>2+</sup> |                 |                 |                 |                 |                 |
| <i>n</i>                                               | <i>n</i> = 0.03 | <i>n</i> = 0.05 | <i>n</i> = 0.06 | <i>n</i> = 0.08 | <i>n</i> = 0.10 |
| <i>a</i> = <i>b</i> = <i>c</i>                         | 10.23942        | 10.23879        | 10.23843        | 10.23664        | 10.23072        |
| cell volume                                            | 1073.56         | 1073.36         | 1073.24         | 1072.68         | 1070.82         |
| <i>R</i> <sub>p</sub>                                  | 6.27%           | 6.51%           | 6.36%           | 6.08%           | 6.19%           |
| <i>R</i> <sub>wp</sub>                                 | 8.19%           | 8.61%           | 8.5%            | 7.73%           | 8%              |

**Table S3.** Excitation, emission, centre of gravity, Stokes shift and crystal field splitting and the CIE coordinates of of BZSO: 0.03Eu<sup>2+</sup>, *m*Ca<sup>2+</sup>/*n*Sr<sup>2+</sup>.

| Samples                                               | $\lambda_{em}$<br>nm | Stokes shift<br>cm <sup>-1</sup> | Centre of gravity<br>cm <sup>-1</sup> | Crystal field splitting<br>cm <sup>-1</sup> | CIE<br>( <i>x</i> , <i>y</i> ) |
|-------------------------------------------------------|----------------------|----------------------------------|---------------------------------------|---------------------------------------------|--------------------------------|
| BZSO:0.03Eu <sup>2+</sup>                             | 501                  | 5292                             | 30832                                 | 9737                                        | (0.191, 0.412)                 |
| BZSO:0.03Eu <sup>2+</sup> , <i>m</i> Ca <sup>2+</sup> |                      |                                  |                                       |                                             |                                |
| 0.01                                                  | 497                  | 5132                             | 30991                                 | 9382                                        | (0.181, 0.347)                 |
| 0.03                                                  | 495                  | 5050                             | 31880                                 | 9276                                        | (0.175, 0.329)                 |
| 0.05                                                  | 490                  | 4844                             | 32017                                 | 9488                                        | (0.168, 0.280)                 |
| 0.06                                                  | 485                  | 4633                             | 32017                                 | 10139                                       | (0.170, 0.277)                 |
| 0.08                                                  | 478                  | 4332                             | 32573                                 | 11888                                       | (0.167, 0.270)                 |
| 0.10                                                  | 472                  | 4066                             | 32644                                 | 12655                                       | (0.165, 0.243)                 |
| BZSO:0.03Eu <sup>2+</sup> , <i>n</i> Sr <sup>2+</sup> |                      |                                  |                                       |                                             |                                |
| 0.01                                                  | 497                  | 5131                             | 30959                                 | 9307                                        | (0.174, 0.363)                 |
| 0.03                                                  | 496                  | 5091                             | 31779                                 | 9140                                        | (0.176, 0.323)                 |
| 0.05                                                  | 492                  | 4927                             | 32085                                 | 9412                                        | (0.166, 0.305)                 |
| 0.06                                                  | 488                  | 4760                             | 32188                                 | 9840                                        | (0.171, 0.283)                 |
| 0.08                                                  | 483                  | 4548                             | 32223                                 | 9397                                        | (0.170, 0.279)                 |
| 0.10                                                  | 480                  | 4419                             | 32327                                 | 9380                                        | (0.163, 0.274)                 |

**Table S4.** The decay life times of  $\text{Eu}^{2+}$  in  $\text{BZSO: } 0.03\text{Eu}^{2+}, m\text{Ca}^{2+}$  ( $m = 0.03\text{--}0.10$ ) and  $\text{BZSO: } 0.03\text{Eu}^{2+}, n\text{Sr}^{2+}$  ( $n = 0.03\text{--}0.10$ ) materials.

| BZSO: $0.03\text{Eu}^{2+}, m\text{Ca}^{2+}$ |            |            |            |            |            |
|---------------------------------------------|------------|------------|------------|------------|------------|
| $m$                                         | $m = 0.03$ | $m = 0.05$ | $m = 0.06$ | $m = 0.08$ | $m = 0.10$ |
| $\tau$ ( $\mu\text{s}$ )                    | 0.894      | 0.765      | 0.797      | 1.149      | 1.156      |
| BZSO: $0.03\text{Eu}^{2+}, n\text{Sr}^{2+}$ |            |            |            |            |            |
| $n$                                         | $n = 0.03$ | $n = 0.05$ | $n = 0.06$ | $n = 0.08$ | $n = 0.10$ |
| $\tau$ ( $\mu\text{s}$ )                    | 0.908      | 0.853      | 0.871      | 1.202      | 1.337      |
